# Supplementary material
Source: PubMed Central journal article supplement (PMC6648798)
Supplement: ao9b00988_si_001.pdf [file ao9b00988_si_001.pdf]

## Supplementary Information

### Direct Synthesis of Large Area Graphene on Insulating Substrates at Low Temperature using Microwave Plasma CVD

Riteshkumar Vishwakarma<sup>1</sup>\*, Rucheng Zhu<sup>1</sup>, Amr Attia Abuelwafa<sup>1</sup>, Yota Mabuchi<sup>1,3</sup>, Sudip Adhikari<sup>1,4</sup>, Susumu Ichimura<sup>2</sup>, Tetsuo Soga<sup>3</sup>, Masayoshi Umeno<sup>1</sup>\*

<sup>1</sup>C's Techno Inc., Co-operative Research Center for Advanced Technology,  
Nagoya Science Park, Moriyama-ku, Nagoya, Japan-4630003

<sup>2</sup> Nagoya Industry Promotion Corporation

3-4-41 Rokuban, Atsuta-ku, Nagoya, Japan- 4560058

<sup>3</sup>Department of Electrical and Mechanical Engineering, Nagoya Institute of Technology,  
Gokiso-cho, Showa-ku, Nagoya 466-8555, Japan,

<sup>4</sup>Department of Electrical Engineering, Chubu University, Matsumoto-cho, Kasugai, Japan-  
487-8501

\*Corresponding authors. E-mail: nanoritesh@gmail.com (Riteshkumar Vishwakarma),  
: umeno@cstechno.hope.cx (Masayoshi Umeno)

| Power (W) | Sheet Resistance ( $\Omega/\square$ ) | Transmittance (%) |
|-----------|---------------------------------------|-------------------|
| 700       | 31k                                   | 94                |
| 800       | 4.7k                                  | 79                |
| 900       | 5.8k                                  | 80                |
| 1000      | 5k                                    | 81                |
| 1100      | 4k                                    | 75                |
| 1200      | 3k                                    | 65                |
| 1300      | 6k                                    | 40                |

Table. S1 Sheet resistance and transmittance of graphene synthesized at different microwave powers

Table S1 explains the dependence of sheet resistance and transmittance on microwave power. Experiments were performed at microwave power from 700W to 1300W and it can be easily observed from table 3 that transmittance decreases as we increase power. Although, sheet resistance decreases but the simultaneous decrease in transmittance also occurs.

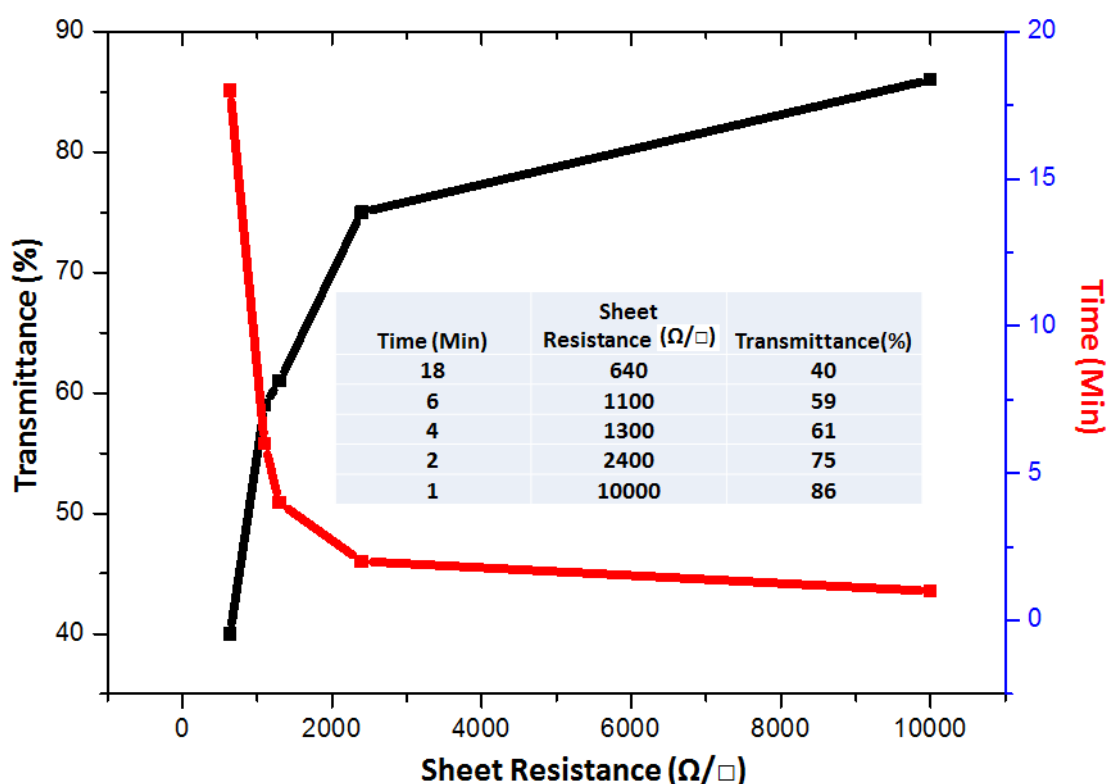

**Figure. S1 Dependence of sheet resistance and transmittance on deposition time**

Therefore, microwave power 1000W was chosen to perform the further experiment as transmittance and sheet resistance of graphene directly grown on glass and quartz at this power was acceptable. After confirming the acceptable microwave plasma power optimum time for deposition was obtained by performing various experiments at different time periods as shown in figure S1. It shows, lesser the time of deposition, higher the

sheet resistance and transmittance and *vice versa*. Deposition time between 2-4 minutes form graphene with sheet resistance ranging from 1300  $\Omega/\square$  to 2400 $\Omega/\square$  and transmittance varied from 60% to 80%. In order to obtain graphene with 80% and more with sheet resistance as low as possible, we concentrated on performing more and more experiments in 2 to 4 minutes of deposition time using microwave plasma CVD.

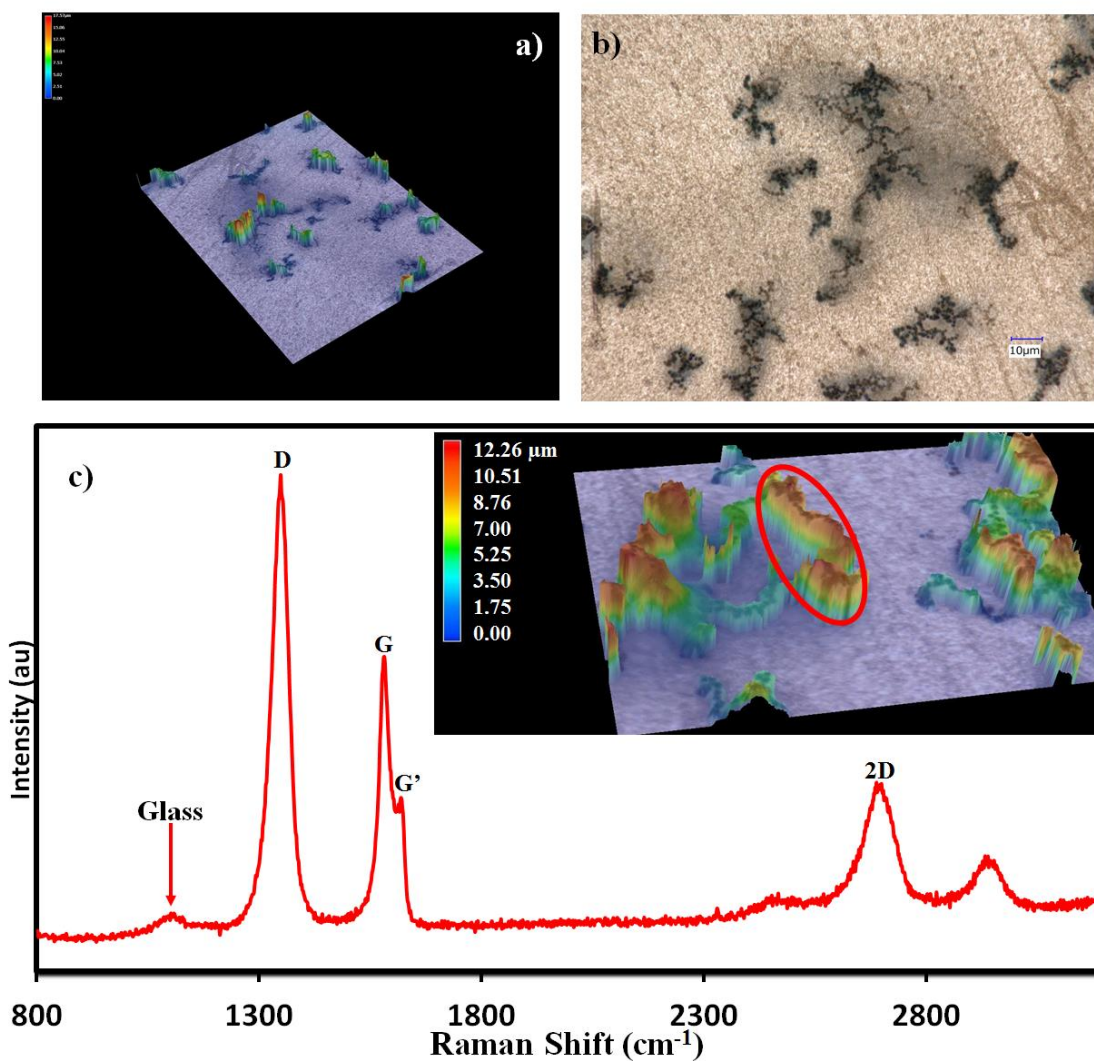

**Figure. S2 a) 3-Dimensional, b) 2-Dimensional optical image of glass surface after graphene deposition without CO<sub>2</sub>, c) Raman spectrum of deposited graphene (with inset showing place of Raman measurement)**

Figure S2 a) shows a 3-dimensional optical image of graphene on glass without CO<sub>2</sub> use,

indicating the formation of so vertical structures. Figure S2 b) shows a typical optical image of a glass surface after graphene deposition.

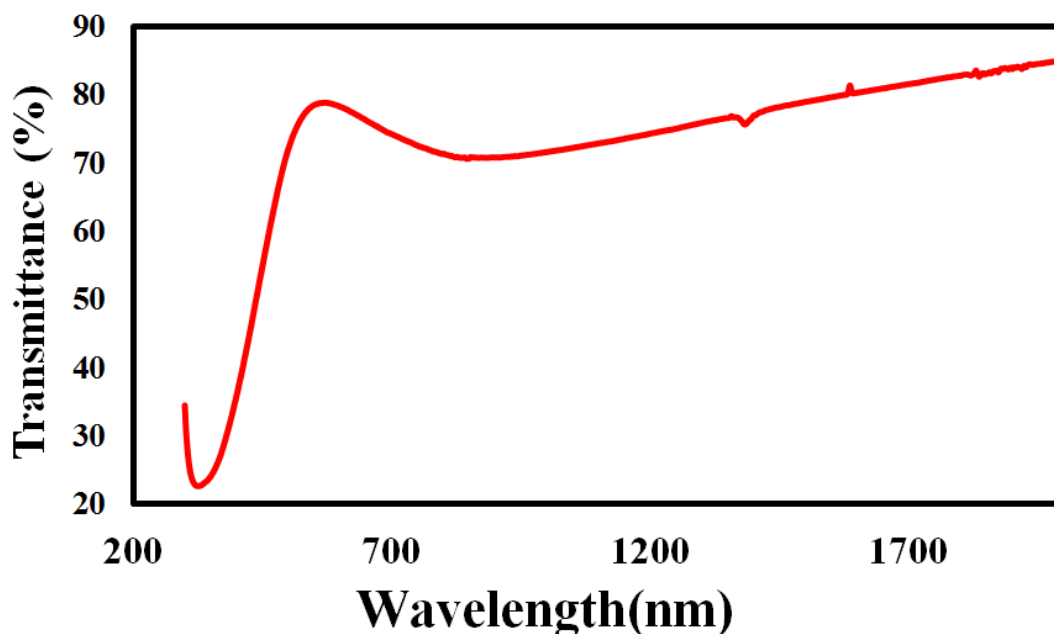

**Figure. S3 Optical transmittance of graphene deposited on quartz**

Optical transmittance characterization of the graphene deposited glass and quartz surfaces were carried out with UV-Vis-NIR on a JASCOV570 spectrophotometer. Fig. S3 shows graphene with transmittance 70-85% in visible and near infra-red regions. Thus formed graphene has acceptable transmittance in the visible region and better transmittance as compared to Indium Tin Oxide in near infra-red regions.

Also, Table S2 shows that ozone treatment has helped in the removal of surface contaminations of graphene, as there is a decrease in carbon percentage causing transmittance to increase by 1%. Whereas, an increase in oxygen and silicon atomic concentrations might be due to the removal of unwanted impurities causing x-rays to detect SiO<sub>2</sub> surface beneath graphene comparatively more easily. Figure S4 also confirms the reduction of impurities of graphene samples after ozone treatment as there is a

decrease in  $I_d/I_g$  ratio.

|                     | C1s (%) | N1s (%) | O1s (%) | Si2p (%) |
|---------------------|---------|---------|---------|----------|
| As-grown graphene   | 97.2    | 0.0     | 1.5     | 1.3      |
| O3 treated graphene | 94.7    | 0.0     | 3.5     | 1.8      |

Table. S2 Surface composition of graphene grown quartz surface

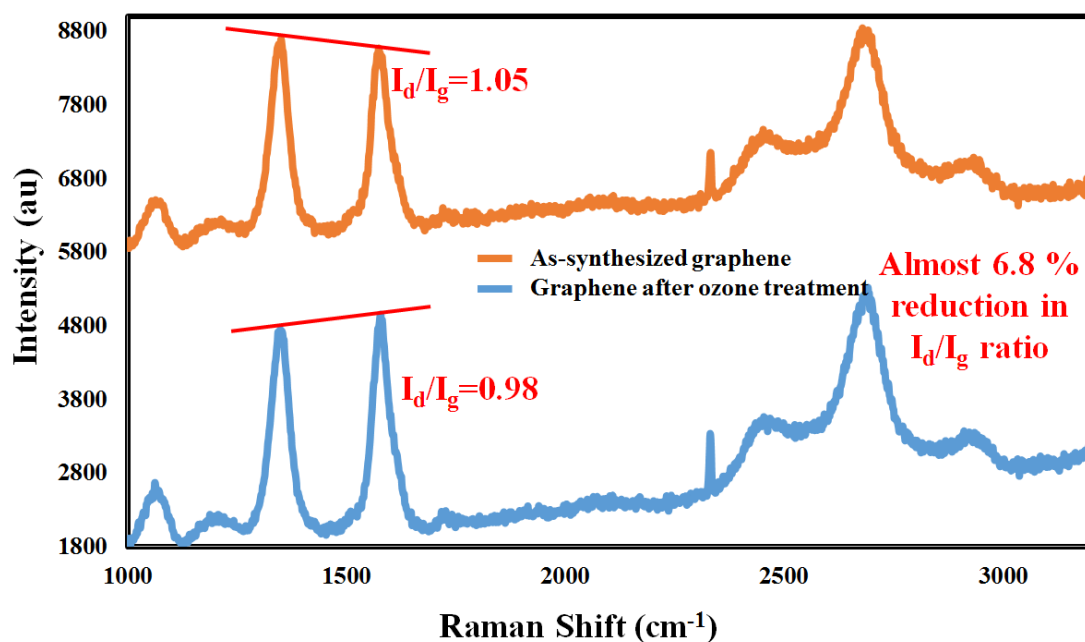

Figure. S4 Raman spectra of quartz surface before and after ozone treatment

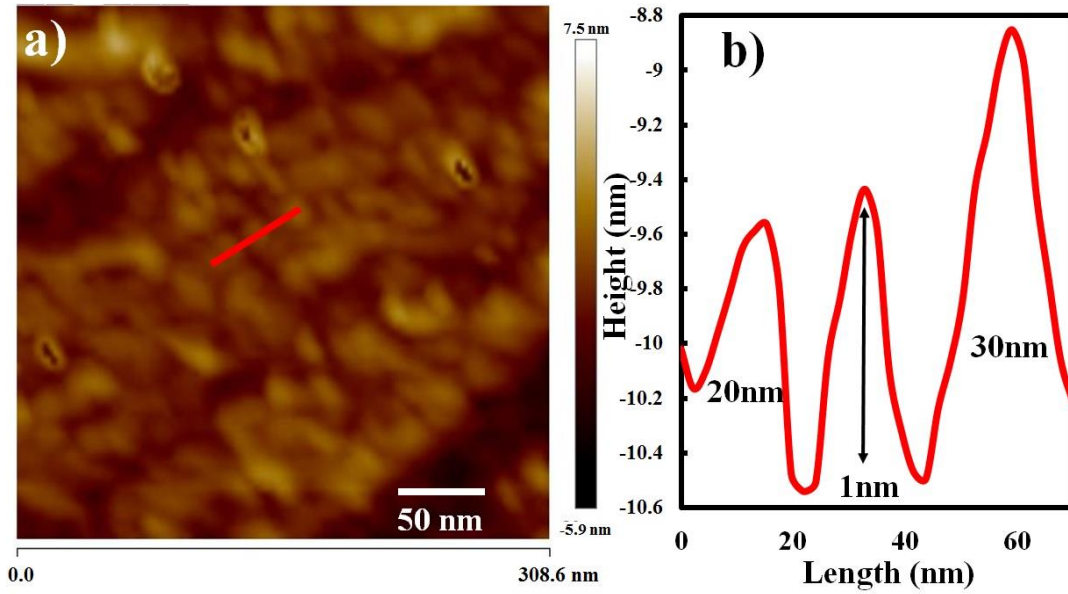

**Figure. S5 a) AFM image of the Silicon surface after graphene deposition for 2 minutes, b) Line profile at the highlighted part on the surface**

| 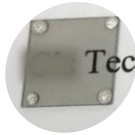 | Carrier Mobility (cm <sup>2</sup> /V.s) | Sheet Carrier Concentration (/cm <sup>2</sup> ) | Sheet Resistance (Ω/□)                              |
|-------------------------------------------------------------------------------------|-----------------------------------------|-------------------------------------------------|-----------------------------------------------------|
| Before Ozone treatment                                                              | <b>9.64</b>                             | <b>2.89x10<sup>14</sup></b>                     | <b>2240</b>                                         |
| After Ozone treatment                                                               | <b>97.5</b>                             | <b>5.09x10<sup>13</sup></b>                     | <b>1259</b>                                         |
| After Ozone treatment                                                               | <b>54.75</b>                            | <b>5.09x10<sup>13</sup></b>                     | <b>Assuming no effect of Ozone on R<sub>s</sub></b> |
| After Ozone treatment                                                               | <b>97.5</b>                             | <b>2.86x10<sup>13</sup></b>                     |                                                     |

**Table. S3 Effect of ozone treatment on carrier mobility and carrier concentration of graphene**

Lake Shore 8400 series Hall measurement instrument was used for sheet carrier and mobility of the samples. This instrument contains the Van der Pauw measurement technique and the formula used for sheet resistance (R<sub>s</sub>) calculation,

$$R_s = \frac{1}{qn_s\mu_m}$$

Where,

$R_s$ = Sheet resistance

$q$ = Charge on the carriers

$n_s$ = Sheet carrier concentration

$\mu_m$ = Mobility of the majority carriers

After cross checking the calculations it was noticed that if ozone treatment had no impact on graphene sheet resistance then the product of  $n_s \mu_m$  before and after ozone treatment should remain the same, and in such case Hall measurement after ozone treatment should yield lower value of carrier mobility (54.75 cm<sup>2</sup>/ V.s) corresponding to 5.09 x 10<sup>13</sup> cm<sup>-2</sup> carriers as shown table S3. However, mobility was found to be 97.5 cm<sup>2</sup>/ V.s which indicates that there is an effect of ozone treatment on graphene and additional 42.75 cm<sup>2</sup>/ V.s of mobility can be responsible for sheet resistance reduction to 1259 Ω/□ from 2240 Ω/□.

Similarly, in the case of carrier concentration, Hall measurement after ozone treatment should yield lower value of carrier concentration (2.86 x 10<sup>13</sup> cm<sup>-2</sup>) corresponding to 97.5 cm<sup>2</sup>/ V.s carrier mobility as shown table S3. However, carrier concentrations was found to be 5.09 x 10<sup>13</sup> cm<sup>-2</sup> indicating ozone treatment helps in increasing p-doping of graphene, as there is an addition in majority carriers by an amount of 2.23 x 10<sup>13</sup> cm<sup>-2</sup> in the calculated value of 2.86 x 10<sup>13</sup> cm<sup>-2</sup>. As reported by Jandhyala *et al.*, physisorbed ozone can be responsible for the upshift of the Dirac point, leading to p-type doping of mechanically exfoliated graphene. With the increase in p-type doping, improved electrical conductivity is expected.

Above mentioned, Hall data and calculations show that carrier concentration and mobility increase after ozone treatment by 43.8% and 56.2%, respectively, from the calculated value in case when no effect of ozone on graphene is assumed.
